# Supplementary material for: ATRX is a predictive marker for endocrinotherapy and chemotherapy resistance in HER2-/HR+ breast cancer through the regulation of the AR, GLI3 and GATA2 transcriptional network
Source: publisher site journal article supplement (doi:10.18632/aging.205327), 2023-12-20
Supplement: Supplementary file [file aging-v15i24-205327-supplementary-material-SD2.pdf]

## SUPPLEMENTARY TABLES

**Supplementary Table 1. GEO database information.**

| GEO database | Platforms | Number of samples | Description                       | Data type                        |
|--------------|-----------|-------------------|-----------------------------------|----------------------------------|
| GSE24460     | GPL571    | 2                 | MCF-7(control)                    | Expression profiling<br>by array |
|              |           | 2                 | MCF-7(Doxorubicin Resistance)     |                                  |
| GSE22513     | GPL570    | 8                 | pCR breast biopsy(paclitaxel)     |                                  |
|              |           | 20                | non-pCR breast biopsy(paclitaxel) |                                  |
| GSE8562      | GPL96     | 3                 | MCF7(control)                     |                                  |
|              |           | 3                 | MCF7/XBP1(Estrogen Resistance)    |                                  |

pCR, pathological complete response.

**Supplementary Table 2. The number of DEGs in each module of WGCNA.**

| Modules      | Number of DEGs |
|--------------|----------------|
| black        | 90             |
| blue         | 159            |
| brown        | 286            |
| cyan         | 43             |
| greenyellow  | 120            |
| grey         | 41             |
| magenta      | 63             |
| midnightblue | 40             |
| pink         | 67             |
| red          | 119            |
| salmon       | 47             |
| tan          | 52             |
| turquoise    | 182            |
| yellow       | 144            |
